# Supplementary material for: Long-Chain Acyl Coenzyme a Dehydrogenase, a Key Player in Metabolic Rewiring/Invasiveness in Experimental Tumors and Human Mesothelioma Cell Lines
Source: Preprints.org preprint supplement (doi:10.20944/preprints202305.0978.v1), 2023-05-15
Supplement: Supplementary file 1 [file supplementary]

## Sheet: Feuil1
Proteins with increased abundance (I)									Proteins with decreased abundance (D)
Code	Gene		Full name						Code	Gene		Full name
A16A1	Aldh16a1	I	Aldehyde dehydrogenase family 16 member A1						2017-09-02	2002-09-01	D	Septin-2
AAPK1	Prkaa1	I	5'-AMP-activated protein kinase catalytic subunit alpha-1						2017-09-07	2007-09-01	D	Septin-7
AASD1	Aarsd1	I	Alanyl-tRNA editing protein Aarsd1						2017-09-11	2011-09-01	D	Septin-11
ACADL	Acadl	I	Long-chain specific acyl-CoA dehydrogenase, mitochondrial						1433E	Ywhae	D	14-3-3 protein epsilon
ADRM1	Adrm1	I	Proteasomal ubiquitin receptor ADRM1						1433F	Ywhah	D	14-3-3 protein eta
AIP	Aip	I	AH receptor-interacting protein						1433G	Ywhag	D	14-3-3 protein gamma
AL7A1	Aldh7a1	I	Alpha-aminoadipic semialdehyde dehydrogenase						AACS	Aacs	D	Acetoacetyl-CoA synthetase
ALDOA	Aldoa	I	Fructose-bisphosphate aldolase						ACACA	Acaca	D	Acetyl-CoA carboxylase 1
ANXA4	Anxa4	I	Annexin A4						ACADS	Acads	D	Short-chain specific acyl-CoA dehydrogenase, mitochondrial
ANXA5	Anxa5	I	Annexin A5						ACLY	Acly	D	ATP-citrate synthase
ARFG3	Arfgap3	I	ADP-ribosylation factor GTPase-activating protein 3						ACON	Aco2	D	Aconitate hydratase, mitochondrial
ATAD3	Atad3	I	ATPase family AAA domain-containing protein 3						ACSL1	Acsl1	D	Long-chain-fatty-acid--CoA ligase 1
ATP5H	Atp5h	I	ATP synthase subunit d, mitochondrial						ACTN4	Actn4	D	Alpha-actinin 4
ATPO	Atp5o	I	ATP synthase subunit O, mitochondrial						ADT1	Slc25a4	D	ADP/ATP translocase 1
BAF	Banf1	I	Barrier-to-autointegration factor						AKAP2	Akap2	D	A-kinase anchor protein 2
BCAT2	Bcat2	I	Branched-chain-amino-acid aminotransferase, mitochondrial						AL1A3	Aldh1a3	D	Aldehyde dehydrogenase family 1 member A3
CAPG	Capg	I	Macrophage-capping protein						ALBU	Alb	D	Serum albumin
CATC	Ctsc	I	Dipeptidyl peptidase 1						ANM1	Prmt1	D	Protein arginine N-methyltransferase 1
CGL	Cth	I	Cystathionine gamma-lyase						ANXA1	Anxa1	D	Annexin A1
CL043	?	I	Uncharacterized protein C12orf43 homolog						ANXA2	Anxa2	D	Annexin A2
CO1A2	Col1a2	I	Collagen alpha-2(I) chain						ANXA8	Anxa8	D	Annexin A8
CO3A1	Col3a1	I	Collagen alpha-1(III) chain						AOC3	Aoc3	D	Membrane primary amine oxidase
COX2	Mtco2	I	Cytochrome c oxidase subunit 2						AP1M1	Ap1m1	D	AP-1 complex subunit mu-1
COX5B	Cox5b	I	Cytochrome c oxidase subunit 5B, mitochondrial						AP2B1	Ap2b1	D	AP-1 complex subunit beta-1
CSPG4	Cspg4	I	Chondroitin sulfate proteoglycan 4						AP2S1	Ap2s1	D	AP-1 complex subunit sigma
CX6C2	Cox6c2	I	Cytochrome c oxidase subunit 6C-2						APMAP	Apmap	D	Adipocyte plasma membrane-associated protein
CYB5	Cyb5a	I	Cytochrome b5 type B						APOA4	Apoa4	D	Apolipoprotein A-IV
DC1I2	Dync1i2	I	Cytoplasmic dynein 1 light intermediate chain 2						ARLY	Asl	D	Argininosuccinate lyase
DCTN4	Dctn4	I	Dynactin subunit 4						AT2B1	Atp2b1	D	Plasma membrane calcium-transporting ATPase 1
DESM	Desm	I	Desmin						B3AT	Slc4a1	D	Band 3 anion transport protein
DJB11	Dnajb11	I	DnaJ homolog subfamily B member 11						BGLR	Gusb	D	Beta-glucuronidase
DKC1	Dkc1	I	H/ACA ribonucleoprotein complex subunit 4						BIEA	Blvra	D	Biliverdin reductase A
DPYL2	Dpysl2	I	Dihydropyrimidinase-related protein 2						CAH3	Cah3	D	Carbonic anhydrase 3
DPYL3	Dpysl3	I	Dihydropyrimidinase-related protein 3						CALM	Calm1	D	Calmodulin
DYN2	Dnm2	I	Dynamin-2						CALU	Calu	D	Calumenin
EF1A1	Eef1a1	I	Elongation factor 1-alpha 1						CAN2	Capn2	D	Calpain-2
EFHD2	Efhd2	I	EF-hand domain-containing protein D2						CATA	Cat	D	Catalase
EFTU	Tufm	I	Elongation factor Tu, mitochondrial						CBPQ	Cpq	D	Carboxypeptidase
EIF3G	Eif3g	I	Eukaryotic translation initiation factor 3 subunit G						CD44	Cd44	D	CD44 antigen
ELAV1	Elavl1	I	ELAV-like protein 1						CD47	Cd47	D	Leukocyte surface antigen CD47
EMD	Emd	I	Emerin						CELF2	Celf2	D	CUGBP Elav-like family member 2
EPDR1	Epdr1	I	Mammalian ependymin-related protein 1						CES1D	Ces1d	D	Carboxylesterase 1D
ERP29	Erp29	I	Endoplasmic reticulum resident protein 29						CISY	Cs	D	Citrate synthase, mitochondrial
FAF2	Faf2	I	FAS-associated factor 2						CLCA	Clta	D	Clathrin light chain A
FETUA	Ahsg	I	Alpha-2-HS-glycoprotein						CNN1	Cnn1	D	Calponin-1
FINC	Fn1	I	Fibronectin						CO4	C4	D	Complement C4
FRIL1	Ftl1	I	Ferritin light chain 1						COBL	Cobl	D	Protein cordon-bleu
FUBP1	Fubp1	I	Far upstream element-binding protein 1						CPNE9	Cpne9	D	Copine-9
FUBP2	Khsrp	I	Far upstream element-binding protein 2						CRP	Crp	D	C-reactive protein
FUT11	Fut11	I	Alpha-(1, 3)-fucosyltransferase 11						CRYAB	Cryab	D	Alpha-crystallin B
G3P	Gapdh	I	Glyceraldehyde-3-phosphate dehydrogenase						CSRP1	Csrp1	D	Cysteine and glycine-rich protein 1
GELS	Gsn	I	Gelsolin						CUTA	Cuta	D	Protein CutA
GLRX1	Glrx	I	Glutaredoxin-1						DAPK3	Dapk3	D	Death-associated protein kinase 3
GOLI4	Golim4	I	Golgi integral membrane protein 4						DCPS	Dcps	D	m7GpppX diphosphatase
GPX1	Gpx1	I	Glutathione peroxidase 1						DDAH1	Ddah1	D	N(G),N(G)-dimethylarginine dimethylaminohydrolase 1
GSHR	Gsr	I	Glutathione reductase						DECR	Decr1	D	2, 4 dienoyl-CoA reductase, mitochondrial
GYS1	Gys1	I	Glycogen [starch] synthase, muscle						DEST	Dstn	D	Destrin
H14	Hist1h1e	I	Histone H1.4						DHB11	Hsd17b11	D	Estradiol 17-beta-dehydrogenase 11
H15	Hist1h1b	I	Histone H1.5						DHB4	Hsd17b4	D	Peroxisomal multifunctional enzyme type 2
H2AJ	H2afj	I	Histone H2A.J						DHCR7	Dhcr7	D	7-dehydrocholesterol reductase
H2B1		I	Histone H2B type 1						DHSO	Sord	D	Sorbitol dehydrogenase
H31		I	Histone H3.1						DLRB1	Dynlrb1	D	Dynein light chain roadblock-type 1
HB2B	RT1-Bb	I	Rano class II histocompatibility antigen, B-1 beta chain						DPEP1	Dpep1	D	Dipeptidase 1
HCD2	Hsd17b10	I	3-hydroxyacyl-CoA dehydrogenase type-2						DX39A	Ddx39a	D	ATP-dependent RNA helicase DDX39A
HMGB2	Hmgb2	I	High mobility group protein B2						DX39B	Ddx39b	D	Spliceosome RNA helicase Ddx39b
HN1	Hn1	I	Hematological and neurological expressed 1 protein						ECHD1	Echdc1	D	Ethylmalonyl-CoA decarboxylase
HNRPC	Hnrnpc	I	Heterogeneous nuclear ribonucleoprotein C						EDF1	Edf1	D	Endothelial differentiation-related factor 1
HNRPF	Hnrnpf	I	Heterogeneous nuclear ribonucleoprotein F						EF2	Eef2	D	Elongation factor 2
HNRPM	Hnrnpm	I	Heterogeneous nuclear ribonucleoprotein M						EHD2	Ehd2	D	EH domain-containing protein 2
HP1B3	Hp1bp3	I	Heterochromatin protein 1-binding protein 3						EIF3B	Eif3b	D	Eukaryotic translation initiation factor 3 subunit B
HSP7C	Hspa8	I	Heat shock cognate 71 kDa protein						ELN	Eln	D	Elastin
HSPB1	Hspb1	I	Heat shock protein beta-1						EMAL2	Eml2	D	Echinoderm microtubule-associated protein-like 2
HXK3	Hk3	I	Hexokinase-3						ENPL	Hsp90b1	D	Endoplasmin
ICAL	Cast	I	Calpastatin						EPN2	Epn2	D	Epsin-2
IDH3A	Idh3a	I	Isocitrate dehydrogenase [NAD] subunit alpha, mitochondrial						ERF1	Etf1	D	Eukaryotic peptide chain release factor subunit 1
IDH3B	Idh3b	I	Isocitrate dehydrogenase [NAD] subunit beta, mitochondrial						ERG7	Lss	D	Lanosterol synthase
IF2A	Eif2s1	I	Eukaryotic translation initiation factor 2 subunit 1						ERMP1	Ermp1	D	Endoplasmic reticulum metallopeptidase 1
IF4A3	Eif4a3	I	Eukaryotic translation initiation factor 4A-III						ESYT1	Esyt1	D	Extended synaptotagmin-1
IF4H	Eif4h	I	Eukaryotic translation initiation factor 4H						EZRI	Ezr	D	Ezrin
IF6	Eif6	I	Eukaryotic translation initiation factor 6						FAAA	Fah	D	Fumarylacetoacetase
IKIP	Ikbip	I	Inhibitor of nuclear factor kappa-B kinase-interacting protein						FABP4	Fabp4	D	Fatty acid-binding protein, adipocyte
IMDH2	Impdh2	I	Inosine-5'-monophosphate dehydrogenase 2						FAS	Fasn	D	Fatty acid synthase
KAD2	Ak2	I	Adenylate kinase 2, mitochondrial						FKB1A	Fkbp1a	D	Peptidyl-prolyl cis-trans isomerase FKBP1A
KDEL2	Kdelc2	I	KDEL motif-containing protein 2						FLNC	Flnc	D	Filamin-C
KPYM	Pkm	I	Pyruvate kinase PKM						FPPS	Fdps	D	Farnesyl pyrophosphate synthase
LDHA	Ldha	I	L-lactate dehydrogenase A chain						GATA6	Gata6	D	Transcription factor GATA-6
LEG3	Lgals3	I	Galectin-3						GMPPA	Gmppa	D	Mannose-1-phosphate guanyltransferase alpha
LMNA	Lmna	I	Prelamin-A/C						GNA11	Gna11	D	Guanine nucleotide-binding protein subunit alpha-11
LRC59	Lrrc59	I	Leucine-rich repeat-containing protein 59						GPDA	Gpd1	D	Glycerol-3-phosphate dehydrogenase [NAD(+)], cytoplasmic
LTOR1	Lamtor1	I	Ragulator complex protein LAMTOR1						GSTM1	Gstm1	D	Glutathione S-transferase Mu 1
MAP1S	Map1s	I	Microtubule-associated protein 1S						GSTM2	Gstm2	D	Glutathione S-transferase Mu 2
MBB1A	Mybbp1a	I	Myb-binding protein 1A						GSTP1	Gstp1	D	Glutathione S-transferase P
MDHM	Mdh2	I	Malate dehydrogenase, mitochondrial						HBA	Hba1	D	Hemoglobin subunit alpha-1/2
METK2	Mat2a	I	S-adenosylmethionine synthase isoform type-2						HBB1	Hbb	D	Hemoglobin subunit beta-1
MRC2	Mrc2	I	C-type mannose receptor 2						HBB2		D	Hemoglobin subunit beta-2
MVP	Mvp	I	Major vault protein						HCDH	Hadh	D	Hydroxyacyl-CoA dehydrogenase, mitochondrial
MYG1	Myg1	I	UPF0160 protein MYG1, mitochondrial						HDAC1	Hdac1	D	Histone deacetylase 1
NCLN	Ncln	I	Nicalin						HEMO	Hpx	D	Hemopexin
NDRG1	Ndrg1	I	Protein NDRG1						HNRH2	Hnrnph2	D	Heterogeneous nuclear ribonucleoprotein H2
NEUA	Cmas	I	N-acylneuraminate cytidylyltransferase						HNRPD	Hnrnpd	D	Heterogeneous nuclear ribonucleoprotein D0
NSF	Nsf	I	Vesicle-fusing ATPase						HNRPQ	Syncrip	D	Heterogeneous nuclear ribonucleoprotein Q
NU153	Nup153	I	Nuclear pore complex protein Nup153						HPRT	Hprt1	D	Hypoxanthine-guanine phosphoribosyltransferase
NU155	Nup155	I	Nuclear pore complex protein Nup155						HRG	Hrg	D	Histidine-rich glycoprotein
NUP53	Nup35	I	Nucleoporin NUP53						HS90A	Hsp90aa1	D	Heat shock protein HSP 90-alpha
NUP93	Nup93	I	Nuclear pore complex protein Nup93						HS90B	Hsp90ab1	D	Heat shock protein HSP90-beta
OAT	Oat	I	Ornithine aminotransferase, mitochondrial						HSP74	Hspa4	D	Heat shock 70 kDa protein 4
OGT1	Ogt	I	UDP-N-acetylglucosamine--peptide N-acetylglucosaminyltransferase 110 kDa subunit						HYOU1	Hyou1	D	Hypoxia up-regulated protein 1
P4HA1	P4ha1	I	Prolyl 4-hydroxylase subunit alpha-1						IF2P	Eif5b	D	Eukaryotic translation initiation factor 5B
PARP1	Parp1	I	Poly [ADP-ribose] polymerase 1						IF4A2	Eif4a2	D	Eukaryotic initiation factor 4A-II
PDIA4	Pdia4	I	Protein disulfide-isomerase A4						IF5A1	Eif5a	D	Eukaryotic translation initiation factor 5A-1
PGAM1	Pgam1	I	Phosphoglycerate mutase 1						ILF2	Ilf2	D	Interleukin enhancer-binding factor 2
PGK1	Pgk1	I	Phosphoglycerate kinase 1						ILK	Ilk	D	Integrin-linked protein kinase
PHB	Phb	I	Prohibitin						ITB1	Itgb1	D	Integrin beta-1
PHB2	Phb2	I	Prohibitin-2						IVD	Ivd	D	Isovaleryl-CoA dehydrogenase, mitochondrial
PLOD1	Plod1	I	Procollagen-lysine, 2-oxoglutarate 5-dioxygenase 1						K1C10	Krt10	D	Keratin, type I cytoskeletal 10
PLP2	Plp2	I	Proteolipid protein 2						K1C14	Krt14	D	Keratin, type I cytoskeletal 14
PLRKT	Plgrkt	I	Plasminogen receptor (KT)						K2C6A	Krt6a	D	Keratin, type II cytoskeletal 6A
PRAF3	Arl6ip5	I	PRA1 family protein 3						L2GL1	Llgl1	D	Lethal(2) giant larvae protein homolog 1
PRP6	Prpf6	I	Pre-mRNA-processing factor 6						LAMB2	Lamb2	D	Laminin subunit beta-2
PSA1	Psma1	I	Proteasome subunit alpha type-1						LGUL	Glo1	D	Lactoylglutathione lyase
PSA3	Psma3	I	Proteasome subunit alpha type-3						LIS1	Pafah1b1	D	Platelet-activating factor acetylhydrolase IB subunit alpha
PSB10	Psmb10	I	Proteasome subunit beta type-10						LMF2	Lmf2	D	Lipase maturation factor 2
PSD11	Psmd11	I	26S proteasome non-ATPase regulatory subunit 11						LMNB1	Lmnb1	D	Lamin-B1
PUF60	Puf60	I	Poly(U)-binding-splicing factor PUF60						LUZP1	Luzp1	D	Leucine zipper protein 1
PUR9	Atic	I	Bifunctional purine biosynthesis protein PURH						MDHC	Mdh1	D	Malate dehydrogenase, cytoplasmic
QKI	Qki	I	Protein quaking						MGST1	Mgst1	D	Microsomal glutathione S-transferase 1
RAB31	Rab31	I	Ras-related protein Rab-31						ML12B	Myl12b	D	Myosin regulatory light chain 12B
RL29	Rpl29	I	60S ribosomal protein L29						MMP14	Mmp14	D	Matrix metalloproteinase-14
RRS1	Rrs1	I	Ribosome biogenesis regulatory protein homolog						MOES	Msn	D	Moesin
RS14	Rps14	I	40S ribosomal protein S14						MPRIP	Mprip	D	Myosin phosphatase Rho-interacting protein
RS17	Rps17	I	40S ribosomal protein S17						MTPN	Mtpn	D	Myotrophin
RS18	Rps18	I	40S ribosomal protein S18						MUG1	Mug1	D	Murinoglobulin-1
RS25	Rps25	I	40S ribosomal protein S25						MYH10	Myh10	D	Myosin-10
RS30	Rps30	I	40S ribosomal protein S30						MYH11	Myh11	D	Myosin-11
RS5	Rps5	I	40S ribosomal protein S5						MYH9	Myh9	D	Myosin-9
RSSA	Rpsa	I	40S ribosomal protein SA						MYL6	Myl6	D	Myosin light polypeptide 6
RTCB	Rtcb	I	tRNA-splicing ligase RtcB homolog						MYO1C	Myo1c	D	Unconventional myosin-Ic
S10A4	S100a4	I	Protein S100-A4						MYO1D	Myo1d	D	Unconventional myosin-Id
S10A6	S100a6	I	Protein S100-A6						NAGAB	Naga	D	Alpha-N-acetylgalactosaminidase
SARNP	Sarnp	I	SAP domain-containing ribonucleoprotein						NB5R3	Cyb5r3	D	NADH-cytochrome b5 reductase 3
SC22B	Sec22b	I	Vesicle-trafficking protein SEC22b						NCAM1	Ncam1	D	Neural cell adhesion molecule 1
SC31A	Sec31a	I	Protein transport protein Sec31A						NDKB	Nme2	D	Nucleoside diphosphate kinase B
SCPDL	Sccpdh	I	Saccharopine dehydrogenase-like oxidoreductase						NEDD8	Nedd8	D	NEDD8
SFXN3	Sfxn3	I	Sideroflexin-3						NHRF1	Slc9a3r1	D	Na(+)/H(+) exchange regulatory cofactor NHE-RF1
SMC3	Smc3	I	Structural maintenance of chromosomes protein 3						NHRF2	Slc9a3r2	D	Na(+)/H(+) exchange regulatory cofactor NHE-RF2
SPRE	Spr	I	Sepiapterin reductase						NIBL1	Fam129b	D	Niban-like protein 1
SRPRB	Srprb	I	Signal recognition particle receptor subunit beta						NID1	Nid1	D	Nidogen-1
SRSF2	Srsf2	I	Serine/arginine-rich splicing factor 2						NP1L1	Nap1l1	D	Nucleosome assembly protein 1-like 1
SRSF6	Srsf6	I	Serine/arginine-rich splicing factor 6						NUCB2	Nucb2	D	Nucleobindin-2
SSBP	Ssbp1	I	Single-stranded DNA-binding protein, mitochondrial						NUDT5	Nudt5	D	ADP-sugar pyrophosphatase
STABP	Stambp	I	STAM-binding protein						ODO2	Dlst	D	Dihydrolipoyllysine-residue succinyltransferase component of 2-oxoglutarate dehydrogenase complex, mitochondrial
SYRC	Rars	I	Arginine--tRNA ligase, cytoplasmic						OPLA	Oplah	D	5-oxoprolinase
TAGL2	Tagln2	I	Transgelin-2						OTUB1	Otub1	D	Ubiquitin thioesterase OTUB1
TALDO	Taldo1	I	Transaldolase						PA1B2	Pafah1b2	D	Platelet-activating factor acetylhydrolase IB subunit beta
TBCA	Tbca	I	Tubulin-specific chaperone A						PABP1	Pabpc1	D	Polyadenylate-binding protein 1
TBG1	Tubg1	I	Tubulin gamma-1 chain						PCNA	Pcna	D	Proliferating cell nuclear antigen
TOIP1	Tor1aip1	I	Torsin-1A-interacting protein 1						PCNP	Pcnp	D	PEST proteolytic signal-containing nuclear protein
TPIS	Tpi1	I	Triosephosphate isomerase						PCY2	Pcyt2	D	Ethanolamine-phosphate cytidylyltransferase
TPM3	Tpm3	I	Tropomyosin alpha-3 chain						PDIA6	Pdia6	D	Protein disulfide-isomerase A6
TPR	Tpr	I	Nucleoprotein TPR						PDLI1	Pdlim1	D	PDZ and LIM domain protein 1
TR150	Thrap3	I	Thyroid hormone receptor-associated protein 3						PDLI2	Pdlim2	D	PDZ and LIM domain protein 2
TRAP1	Trap1	I	Heat shock protein 75 kDa, mitochondrial						PDLI3	Pdlim3	D	PDZ and LIM domain protein 3
TWF1	Twf1	I	Twinfilin-1						PGM1	Pgm1	D	Phosphoglucomutase-1
UBA1	Uba1	I	Ubiquitin-like modifier-activating enzyme 1						PGRC1	Pgrmc1	D	Membrane-associated progesterone receptor component 1
UGGG1	Uggt1	I	UDP-glucose:glycoprotein glucosyltransferase 1						PGRC2	Pgrmc2	D	Membrane-associated progesterone receptor component 2
VAMP8	Vamp8	I	Vesicle-associated membrane protein 8						PGS2	Dcn	D	Decorin
VATB2	Atp6v1b2	I	V-type proton ATPase subunit B, brain isoform						PLEC	Plec	D	Plectin
WBP11	Wbp11	I	WW domain-binding protein 11						PLST	Pls3	D	Plastin-3
WDR81	Wdr81	I	WD repeat-containing protein 81						PNPH	Pnp	D	Purine nucleoside phosphorylase
WIPF1	Wipf1	I	WAS/WASL-interacting protein family member 1						PP1B	Ppp1cb	D	Serine/threonine-protein phosphatase PP1-beta catalytic subunit
WNK1	Wnk1	I	Serine/threonine-protein kinase WNK1						PP1G	Ppp1cc	D	Serine/threonine-protein phosphatase PP1-gamma catalytic subunit
YBOX1	Ybx1	I	Nuclease-sensitive element-binding protein 1						PRDBP	Prkcdbp	D	Protein kinase C delta-binding protein
ZCCHV	Zc3hav1	I	Zinc finger CCCH-type antiviral protein 1						PRDX1	Prdx1	D	Peroxiredoxin-1
									PRDX2	Prdx2	D	Peroxiredoxin-2
									PRDX3	Prdx3	D	Thioredoxin-dependent peroxide reductase, mitochondrial
									PRDX6	Prdx6	D	Peroxiredoxin-6
									PRS7	Psmc2	D	26S protease regulatory subunit 7
									PSA2	Psma2	D	Proteasome subunit alpha type-2
									PSA5	Psma5	D	Proteasome subunit alpha type-5
									PSA7	Psma7	D	Proteasome subunit alpha type-7
									PSMD2	Psmd2	D	26S proteasome non-ATPase regulatory subunit 2
									PTGIS	Ptgis	D	Prostacyclin synthase
									PTMA	Ptma	D	Prothymosin alpha
									PTRF	Ptrf	D	Polymerase I and transcript release factor
									PYGB	Pygb	D	Glycogen phosphorylase, brain form
									RAB14	Rab14	D	Ras-related protein Rab-14
									RAB2A	Rab2a	D	Ras-related protein Rab-2A
									RAB5A	Rab5a	D	Ras-related protein Rab-5A
									RAB6A	Rab6a	D	Ras-related protein Rab-6A
									RAC1	Rac1	D	Ras-related C3 botulinum toxin substrate 1
									RACK1	Rack1	D	Receptor of activated protein C kinase 1
									RAN	Ran	D	GTP-binding nuclear protein Ran
									RB11B	Rab11b	D	Ras-related protein Rab-11B
									RINI	Rnh1	D	Ribonuclease inhibitor
									RL10	Rpl10	D	60S ribosomal protein L10
									RL12	Rpl12	D	60S ribosomal protein L12
									RL14	Rpl14	D	60S ribosomal protein L14
									RL21	Rpl21	D	60S ribosomal protein L21
									RL22	Rpl22	D	60S ribosomal protein L22
									RL27	Rpl27	D	60S ribosomal protein L27a
									RL27A	Rpl27a	D	60S ribosomal protein L27a
									RL31	Rpl31	D	60S ribosomal protein L31
									RL34	Rpl34	D	60S ribosomal protein L34
									RL6	Rpl6	D	60S ribosomal protein L6
									RLA0	Rplp0	D	60S ribosomal protein P0
									RMD3	Rmdn3	D	Regulator of microtubule dynamics protein 3
									RPN2	Rpn2	D	Dolichyl-diphosphooligosaccharide--protein glycosyltransferase subunit 2
									RRAGB	RragB	D	Ras-related GTP-binding protein B
									RRAS	Rras	D	Ras-related protein R-Ras
									RS11	Rps11	D	40S ribosomal protein S11
									RS12	Rps12	D	40S ribosomal protein S12
									RS15A	Rps15a	D	40S ribosomal protein S15a
									RS20	Rps20	D	40S ribosomal protein S20
									RS23	Rps23	D	40S ribosomal protein S23
									RS3	Rps3	D	40S ribosomal protein S3
									RS4X	Rps4x	D	40S ribosomal protein S4, X isoform
									RS6	Rps6	D	40S ribosomal protein S6
									RS7	Rps7	D	40S ribosomal protein S7
									RS8	Rps8	D	40S ribosomal protein S8
									RS9	Rps9	D	40S ribosomal protein S9
									S10AA	S100a10	D	Protein S100-A10
									SAR1B	Sar1b	D	GTP-binding protein SAR1b
									SBP1	Selenbp1	D	Selenium-binding protein 1
									SCRN1	Scrn1	D	Secernin-1
									SERA	Phgdh	D	D-3-phosphoglycerate dehydrogenase
									SERPH	Serpinh1	D	Serpin H1
									SET	Set	D	Protein SET
									SGTA	Sgta	D	Small glutamine-rich tetratricopeptide repeat-containing protein alpha
									SND1	Snd1	D	Staphylococcal nuclease domain-containing protein 1
									SODC	Sod1	D	Superoxide dismutase [Cu-Zn]
									SPA3K	Serpina3k	D	Serine protease inhibitor A3K
									SPTN1	Sptan1	D	Spectrin alpha chain, non-erythrocytic 1
									SUOX	Suox	D	Sulfite oxidase, mitochondrial
									SYFA	Farsa	D	Phenylalanine--tRNA ligase alpha subunit
									SYSC	Sars	D	Serine--tRNA ligase, cytoplasmic
									SYUG	Sncg	D	Gamma-synuclein
									SYVC	Vars	D	Valine--tRNA ligase, cytoplasmic
									TAGL	Tagln	D	Transgelin
									TBA4A	Tuba4a	D	Tubulin alpha-4A chain
									TCPA	Tcp1	D	T-complex protein 1 subunit alpha
									TCTP	Tpt1	D	Translationally-controlled tumor protein
									TERA	Vcp	D	Transitional endoplasmic reticulum ATPase
									THIC	Acat2	D	Acetyl-CoA acetyltransferase, cytosolic
									THTM	Mpst	D	3-mercaptopyruvate sulfurtransferase
									THTR	Tst	D	Thiosulfate sulfurtransferase
									TIM9	Timm9	D	Mitochondrial import inner membrane translocase subunit Tim9
									TINAL	Tinagl1	D	Tubulointerstitial nephritis antigen-like
									TKFC	Tkfc	D	Triokinase/FMN cyclase
									TMED2	Tmed2	D	Transmembrane emp24 domain-containing protein 2
									TMM33	Tmem33	D	Transmembrane protein 33
									TOP2A	Top2a	D	DNA topoisomerase 2-alpha
									TYB10	Tmsb10	D	Thymosin beta-10
									UB2V2	Ube2v2	D	Ubiquitin-conjugating enzyme E2 variant 2
									UBP10	Usp10	D	Ubiquitin carboxyl-terminal hydrolase 10
									UGDH	Ugdh	D	UDP-glucose 6-dehydrogenase
									VAT1	Vat1	D	Synaptic vesicle membrane protein VAT-1 homolog
									VP26A	Vps26a	D	Vacuolar protein sorting-associated protein 26A
									VPS4A	Vps4a	D	Vacuolar protein sorting-associated protein 4A
									VTDB	Gc	D	Vitamin D-binding protein
									VWA5A	Vwa5a	D	von Willebrand factor A domain-containing protein 5A
