# Supplementary material for: Long-Chain Acyl Coenzyme a Dehydrogenase, a Key Player in Metabolic Rewiring/Invasiveness in Experimental Tumors and Human Mesothelioma Cell Lines
Source: Preprints.org preprint supplement (doi:10.20944/preprints202305.0978.v1), 2023-05-15
Supplement: Supplementary file 2 [file Supplementary Table S1.docx]

**Supplementary Table S1.** Primers for gene expression analysis.

| **Gene** | **Forward sequence** | **Reverse sequence** |
| --- | --- | --- |
| **ACADL** | TGCAATAGCAATGACAGAGCC | CGCAACTACAATCACAACATCAC |
| **ALDH7A1** | ATGGCAAGCCCTATGTCATCT | CCGTGGTACTTATCAGCCCA |
| **ATP5H** | GCTGGGCGAAAACTTGCTCTA | CCAGTCGATAGCTGGTGGATT |
| **ATPO** | ATTGAAGGTCGCTATGCCACA | GCTTTTCACTTTAATGGAACGCT |
| **BCAT2** | CGCTCCTGTTCGTCATTCTCT | CCCACCTAACTTGTAGTTGCC |
| **MTCO2** | ACAGATGCAATTCCCGGACGTCTA | GGCATGAAACTGTGGTTTGCTCCA |
| **COX5B** | TGTGAAGAGGACAATACCAGCG | CCAGCTTGTAATGGGCTCCAC |
| **COX6C2** | TGTTGGCTGCTGCGTCACATTC | CAGAATCTTCCAGGTCCTCGCTCC |
| **TUFM** | GGGGCTAAGTTCAAGAAGTACG | CACATGAGCCGCATTGATGG |
| **HSD17B10** | TGGCGGTAATAACCGGAGGA | ACAGTTGACAGCTACATCCACA |
| **IDH3A** | CCCGCGTGGATCTCTAAGG | AATTTCTGGGCCAATACCATCTC |
| **IDH3B** | GAGCCAAGTCTCAGCGGATT | GGGCATCACAAGCACATCAAA |
| **AK2** | GCAGAACCCGAGTATCCTAAAGG | TTCCCAGCATCCATAGTTGCC |
| **MDH2** | TCGGCCCAGAACAATGCTAAA | GCGGCTTTGGTCTCGATGT |
| **MYG1** | ACAATGGCACCTTCCACTGCGA | ACCACGATGTCACAGGAAGCGA |
| **OAT** | TGGACCATTTATGCCGGGATT | GCTTCACCCTGAATTGGTTCT |
| **PHB** | GACCACGTAATGTGCCAGTCA | CATCATAGTCCTCTCCGATGCT |
| **PHB2** | GTGCGCGAATCTGTGTTCAC | GATAATGGGGTACTGGAACCAAG |
| **SSBP1** | TGAGTCCGAAACAACTACCAGT | CCTGATCGCCACATCTCATTAG |
| **TRAP1** | AGGACGACTGTTCAGCACG | CCGGGCAACAATGTCCAAAAG |
| **ACADS** | GATGGCAAATGTAGACCCTACC | AAGGCCCGGAGTATCACGA |
| **ACO2** | GAGCGAGGCAAGTCGTACC | GGCTTCAATCAGATGGTCACAG |
| **CS** | TGCTTCCTCCACGAATTTGAAA | CCACCATACATCATGTCCACAG |
| **DECR1** | TCTTCAAAAAGCGATGCTACCA | CTATCACGCACTGAGCACCT |
| **GSTP1** | CCCTACACCGTGGTCTATTTCC | CAGGAGGCTTTGAGTGAGC |
| **HCDH** | ATATGCCGCAATTTTACAGGGT | ACCTGCAATAAAGCAGCCTGG |
| **IVD** | GCTGACCTGTTGAGTGAGGC | TCGGTGAGCGTCTTGGTCTTA |
| **MGST1** | ATGACAGAGTAGAACGTGTACGC | TACAGGAGGCCAATTCCAAGA |
| **DLST** | GAACTGCCCTCTAGGGAGAC | AACCTTCCTGCTGTTAGGGTA |
| **PRDX3** | GGCCTGTCTGAGTGTTAATGATG | GGAGCCGAACCTTGCCTTC |
| **RMDN3** | CCAGCGATGGAAACGGACC | GGGATCTGAAGTCTGCGTATAGT |
| **S100A10** | GGCTACTTAACAAAGGAGGACC | GAGGCCCGCAATTAGGGAAA |
| **SUOX** | ACTCAAGTCAATCCCCTCAAGG | GCTGGAGTTATCACCAGAGAAGG |
| **MPST** | CGCCGTGTCACTGCTTGAT | CAGGTTCAATGCCGTCTCG |
| **TST** | ACTTCACCAGACCAAGGAGAT | CCGACAGCATTTCCACAATTTT |
| **TIMM9** | AGAGACCTGCTTTTTGGACTGTG | CCTGAAATCTCATGGATATTCTTTG |
